# Supplementary material for: Grain Yield Response of Corn (Zea mays L.) to Nitrogen Management Practices and Flooding
Source: Plants (Basel). 2020 Mar 10;9(3):348. doi: 10.3390/plants9030348 (PMC7154854; doi:10.3390/plants9030348)
Supplement: Supplementary file 1 [file plants-09-00348-s001.pdf]

**Table S1.** Average vegetative growth stage, plant height, and leaf greenness (SPAD) at the day of flood initiation for each flood duration (FD) and N management practice (NMP). *p* values are presented within each column for FD, NMP, and FD × NMP.

| FD       | NMP                   | Growth Stage | Plant Height | Leaf Greenness |
|----------|-----------------------|--------------|--------------|----------------|
| days     | kg N ha <sup>-1</sup> |              | cm           | SPAD           |
| 0        |                       | 4.2          | 43.1         | 39.3           |
| 2        |                       | 4.3          | 43.2         | 39.2           |
| 4        |                       | 4.3          | 44.2         | 38.6           |
| 6        |                       | 4.3          | 44.2         | 39.9           |
|          | 0                     | 4.3          | 43.4         | 39.3           |
|          | 134                   | 4.3          | 43.6         | 39.2           |
|          | 134+67                | 4.3          | 43.9         | 39.3           |
| FD       |                       | 0.8315       | 0.4873       | 0.2994         |
| NMP      |                       | 0.9432       | 0.4942       | 0.9920         |
| FD × NMP |                       | 0.0605       | 0.1133       | 0.0527         |

**Table S2.** Grain moisture at harvest and stalk lodging for each flood duration (FD) and N management practice (NMP). *p* values are presented within each column for FD, NMP, and FD × NMP.

| FD       | NMP                   | Grain Moisture | Stalk Lodging |
|----------|-----------------------|----------------|---------------|
| days     | kg N ha <sup>-1</sup> | %              |               |
| 0        |                       | 19.6           | 0.2           |
| 2        |                       | 20.0           | 1.1           |
| 4        |                       | 20.0           | 0.1           |
| 6        |                       | 20.3           | 0.3           |
|          | 0                     | 20.1           | 0.1           |
|          | 134                   | 19.9           | 0.9           |
|          | 134+67                | 19.9           | 0.3           |
| FD       |                       | 0.3779         | 0.2038        |
| NMP      |                       | 0.8907         | 0.0604        |
| FD × NMP |                       | 0.9598         | 0.0941        |

**Table S3.** Biomass of 10 ear leaves collected at the R1 growth stage. *p* values are presented within each column for FD, NMP, and FD × NMP. Different letters denote differences in means for the FD × NMP interaction.

| FD       | NMP                   | Ear Leaf Biomass   |
|----------|-----------------------|--------------------|
| days     | kg N ha <sup>-1</sup> | g                  |
| 0        | 0                     | 40.0 <sup>c</sup>  |
|          | 134                   | 44.4 <sup>b</sup>  |
|          | 134+67                | 49.5 <sup>a</sup>  |
| 2        | 0                     | 31.2 <sup>d</sup>  |
|          | 134                   | 41.4 <sup>bc</sup> |
|          | 134+67                | 44.5 <sup>b</sup>  |
| 4        | 0                     | 23.1 <sup>e</sup>  |
|          | 134                   | 31.6 <sup>d</sup>  |
|          | 134+67                | 41.2 <sup>bc</sup> |
| 6        | 0                     | 21.3 <sup>e</sup>  |
|          | 134                   | 24.9 <sup>e</sup>  |
| 4        | 134+67                | 33.9 <sup>d</sup>  |
| FD       |                       | <0.0001            |
| NMP      |                       | <0.0001            |
| FD × NMP |                       | 0.0176             |
